# Supplementary material for: Binge Eating, Mood, and Quality of Life in Youth With Type 2 Diabetes: Baseline data from the TODAY study
Source: PubMed Central journal article supplement — Diabetes Care. 2011 Mar 21;34(4):858–60. doi: 10.2337/dc10-1704 (PMC3064041; doi:10.2337/dc10-1704), 2011-03-21
Supplement: supp_dc10-1704v101704_DC101704SupplementaryData.pdf [file supp_dc10-1704v101704_DC101704SupplementaryData.pdf]

## SUPPLEMENTARY DATA

The following individuals and institutions constitute the TODAY Study Group (\* indicates principal investigator or director):

**CLINICAL CENTERS** **Baylor College of Medicine:** S. McKay\*, B. Anderson, C. Bush, S. Gunn, M. Haymond, H. Holden, K. Hwu, S. M. Jones, McGirk, B. Schreiner, S. Thamocharan, M. Zarate **Case Western Reserve University:** L. Cuttler\*, E. Abrams, T. Casey, W. Dahms (deceased), A. Davis, A. Haider, S. Huestis, C. Ievers-Landis, B. Kaminski, M. Koontz, S. MacLeish, P. McGuigan, S. Narasimhan, D. Rogers **Childrens Hospital Los Angeles:** M. Geffner\*, V. Barraza, N. Chang, B. Conrad, D. Dreimane, S. Estrada, L. Fisher, E. Fleury-Milfort, S. Hernandez, B. Hollen, F. Kaufman, E. Law, V. Mansilla, D. Miller, C. Muñoz, R. Ortiz, J. Sanchez, A. Ward, K. Wexler, Y.K. Xu, P. Yasuda **Children's Hospital of Philadelphia:** L. Levitt Katz\*, R. Berkowitz, K. Gralewski, B. Johnson, J. Kaplan, C. Keating, C. Lassiter, T. Lipman, G. McGinley, H. McKnight, B. Schwartzman, S. Willi **Children's Hospital of Pittsburgh:** S. Arslanian\*, F. Bacha, S. Foster, B. Galvin, T. Hannon, A. Kriska, I. Libman, M. Marcus, K. Porter, T. Songer, E. Venditti **Columbia University Medical Center:** R. Goland\*, R. Cain, I. Fennoy, D. Gallagher, P. Kringas, N. Leibel, R. Motaghedi, D. Ng, M. Ovalles, M. Pellizzari, R. Rapaport, K. Robbins, D. Seidman, L. Siegel-Czarkowski, P. Speiser **Joslin Diabetes Center:** L. Laffel\*, A. Goebel-Fabbri, M. Hall, L. Higgins, M. Malloy, K. Milaszewski, L. Orkin, A. Rodriguez-Ventura **Massachusetts General Hospital:** D. Nathan\*, L. Bissett, K. Blumenthal, L. Delahanty, V. Goldman, A. Goseco, M. Larkin, L. Levitsky, R. McEachern, K. Milaszewski, D. Norman, B. Nwosu, S. Park-Bennett, D. Richards, N. Sherry, B. Steiner **Saint Louis University:** S. Tollefsen\*, S. Carnes, D. Dempsher, D. Flomo, V. Kociela, T. Whelan, B. Wolff **State University of New York Upstate Medical University:** R. Weinstock\*, D. Bowerman, S. Bristol, J. Bulger, J. Hartsig, R. Izquierdo, J. Kearns, R. Saletsky, P. Trief **University of Colorado Denver:** P. Zeitler\* (Steering Committee Chair), N. Abramson, A. Bradhurst, N. Celona-Jacobs, J. Higgins, A. Hull, M. Kelsey, G. Klingensmith, K. Nadeau, T. Witten **University of Oklahoma Health Sciences Center:** K. Copeland\* (Steering Committee Vice-Chair), R. Brown, J. Chadwick, L. Chalmers, C. Macha, A. Nordyke, T. Poulsen, L. Pratt, J. Preske, J. Schanuel, J. Smith, S. Sternlof, R. Swisher **University of Texas Health Science Center at San Antonio:** J. Lynch\*, N. Amodei, R. Barajas, C. Cody, D. Hale, J. Hernandez, C. Ibarra, E. Morales, S. Rivera, G. Rupert, A. Wauters **Washington University School of Medicine:** N. White\*, A. Arbeláez, J. Jones, T. Jones, M. Sadler, M. Tanner, A. Timpson, R. Welch **Yale University:** S. Caprio\*, M. Grey, C. Guandalini, S. Lavietes, M. Mignosa, P. Rose, A. Syme, W. Tamborlane

**COORDINATING CENTER** **George Washington University Biostatistics Center:** K. Hirst\*, S. Edelstein, P. Feit, N. Grover, C. Long, L. Pyle

**PROJECT OFFICE** **National Institute of Diabetes and Digestive and Kidney Diseases:** B. Linder\*

SUPPLEMENTARY DATA

**CENTRAL UNITS** **Central Blood Laboratory (Northwest Lipid Research Laboratories, University of Washington):** S. Marcovina\*, J. Chmielewski, M. Ramirez, G. Strylewicz **DEXA Reading Center (University of California at San Francisco):** J. Shepherd\*, B. Fan, L. Marquez, M. Sherman, J. Wang **Diet Assessment Center (University of South Carolina):** E. Mayer-Davis\*, Y. Liu, M. Nichols **Lifestyle Program Core (Washington University):** D. Wilfley\*, D. Aldrich-Rasche, K. Franklin, D. Laughlin, G. Leibach, C. Massmann, M. Mills, D. O'Brien, J. Patterson, T. Tibbs, D. Van Buren, A. Vannucci

**OTHER Centers for Disease Control:** P. Zhang **Hospital for Sick Children, Toronto:** M. Palmert **State University of New York at Buffalo:** L. Epstein **University of Florida:** J. Silverstein
